# Supplementary material for: l-Methionine-Zr complex supported on magnetic ZnFe2O4 as a novel, green, and efficient heterogeneous magnetic nanocatalyst for the synthesis of 1H-tetrazole and polyhydroquinoline derivatives
Source: Royal Society of Chemistry journal article supplement (doi:10.1039/d2nj04071a), 2023-01-01
Supplement: d2nj04071a1.pdf [file d2nj04071a1.pdf]

## L-Methionine-Zr complex supported on magnetic ZnFe<sub>2</sub>O<sub>4</sub> as a novel, green, and efficient heterogeneous magnetic nanocatalyst for the synthesis of 1H-tetrazole and polyhydroquinoline derivatives

Farhad Khanmohammadi-Sarabi, Arash Ghorbani-Choghamarani\*, Hamid Aghavandi, Mohammad Ali Zolfigol\*

Department of Organic Chemistry, Faculty of Chemistry, Bu-Ali Sina University, Hamedan, 6517838683, Iran

| Contents                 | Page                                                                                                                                                                                                                                                                                                                                                                                                               |          |
|--------------------------|--------------------------------------------------------------------------------------------------------------------------------------------------------------------------------------------------------------------------------------------------------------------------------------------------------------------------------------------------------------------------------------------------------------------|----------|
| <b>Figure 1, 2 and 3</b> | <b>4-(1H-tetrazol-5-yl) phenol:</b> FT-IR (KBr) $\nu$ (cm <sup>-1</sup> ): 3320, 2804, 2612, 1616, 1492, 1356, 1076, 748, 466. <sup>1</sup> H NMR (250 MHz, DMSO, ppm) $\delta$ = 7.03-7.98 (m, 4H), 3.76 (s, 1H), 10.93 (s, 1H). MS m/z =162.0. Melting point: 234-235                                                                                                                                            | <b>2</b> |
| <b>Figure 4, 5 and 6</b> | <b>5-(3-Nitrophenyl)-1H-tetrazole:</b> FTIR (KBr) $\nu$ (cm <sup>-1</sup> ): 3481, 3094, 2912, 1622, 1531, 1353, 1084, 728, 459. <sup>1</sup> H NMR (250 MHz, DMSO, ppm) $\delta$ = 7.86-8.82 (m, 4H), 2.86 (s, 1H). MS m/z =191.04. Melting point: 143-157                                                                                                                                                        | <b>3</b> |
| <b>Figure 7, 8 and 9</b> | <b>4-(1H-tetrazol-5-yl) benzonitrile:</b> FTIR (KBr) $\nu$ (cm <sup>-1</sup> ): 3451, 2887, 2235, 1650, 1502, 1439, 1116, 845, 750, 554. <sup>1</sup> H NMR (250 MHz, DMSO, ppm) $\delta$ = 8.4-8.21 (m, 4H), 3.40 (s, 1H). MS m/z =171.0. Melting point: 192-193                                                                                                                                                  | <b>4</b> |
| <b>Figure 10</b>         | <b>Ethyl 4-(4-methoxyphenyl)-2,7,7-trimethyl-5-oxo-1,4,5,6,7,8-hexahydroquinoline-3-carboxylate:</b> <sup>1</sup> H NMR (250 MHz, DMSO, $\delta$ (ppm)): $\delta$ H: 0.96 (s, 3H), 1.08 (s, 3H), 1.23 (t, J = 7.1 Hz, 3H), 1.90-1.97 (m, 4H), 2.10(t, 3H), 3.92 (q, J = 7.1 Hz, 2H), 4.35 (s, 3H), 4.75(s, 1H), 7.0-7.3 (d, J = 8.0 Hz 2H), 6.69-6.72 (d, J = 7.8 Hz 2H), 9.01 (s, 1H) ppm. Melting point: 256-258 | <b>5</b> |
| <b>Figure 11</b>         | <b>Ethyl 4-(4-chlorophenyl)-2,7,7-trimethyl-5-oxo-1,4,5,6,7,8-hexahydroquinoline-3-carboxylate:</b> <sup>1</sup> H NMR (250 MHz, DMSO, $\delta$ (ppm)): $\delta$ H= 0.79 (s, 3H), 0.97 (d, J = 2.0 Hz, 3H), 1.08 (t, J = 7.1 Hz, 3H), 1.90-1.96 (m, 4H), 2.35 (t, 3H), 3.92(q, J = 7.1 Hz, 2H), 4.80 (s, 1H), 7.13-7.20 (m, 4H), 9.10 (s, 1H) ppm. Melting point: 244-246                                          | <b>6</b> |

\* Address correspondence to Arash Ghorbani-Choghamarani, Department of Organic Chemistry, Faculty of Chemistry, Bu-Ali Sina University, Hamedan 6517838683, Iran Tel: +988138282807 Fax: +988138380709 E-mail: a.ghorbani@basu.ac.ir or arashghch58@yahoo.com and Mohammad Ali Zolfigol (E-mail: Zolfi@basu.ac.ir), Department of Organic Chemistry, Faculty of Chemistry, Bu-Ali Sina University, Hamedan 6517838683, Iran Tel: +988138282807 Fax: +988138380709.

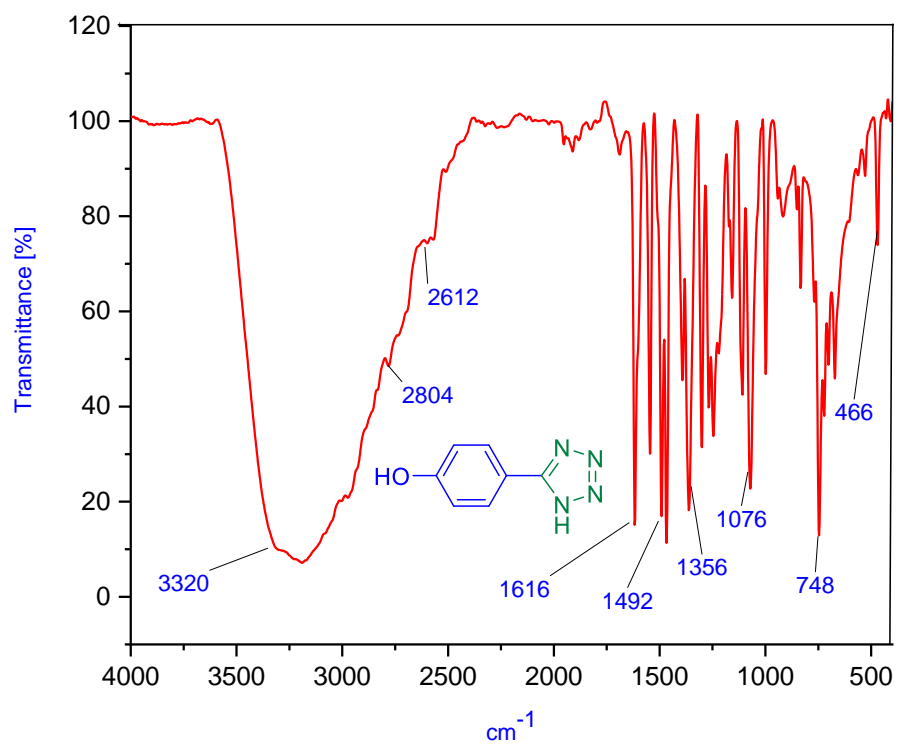

**Figure 1:** FT-IR analysis of 4-(1H-tetrazol-5-yl)phenol.

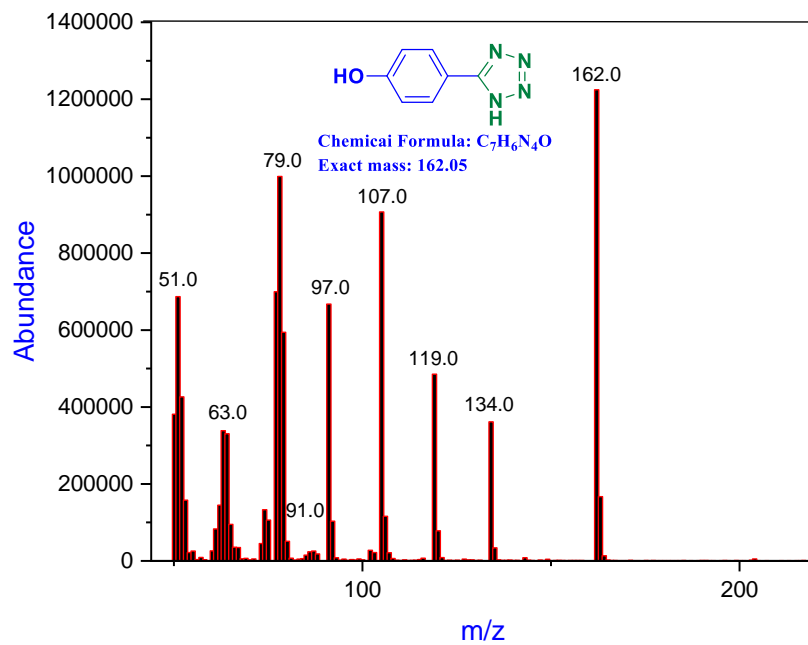

**Figure 2:** The Mass spectrum of 4-(1H-tetrazol-5-yl)phenol.

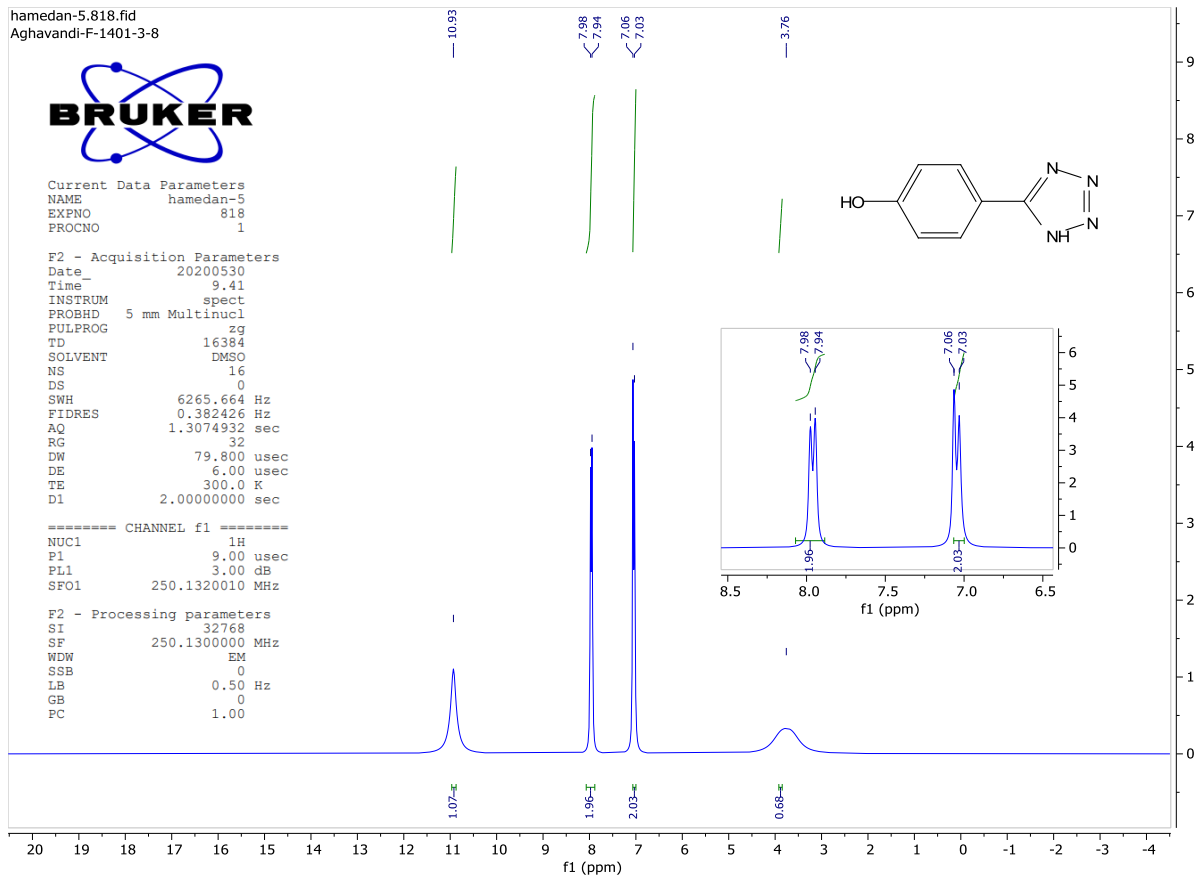

**Figure 3:**  $^1\text{H-NMR}$  4-(1H-tetrazol-5-yl) phenol.

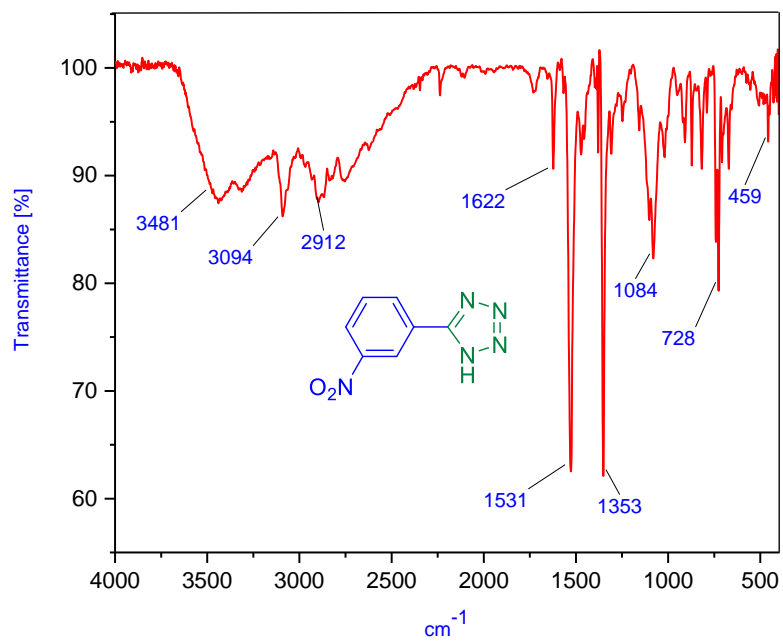

**Figure 4:** FT-IR analysis of 5-(3-nitrophenyl)-1H-tetrazole.

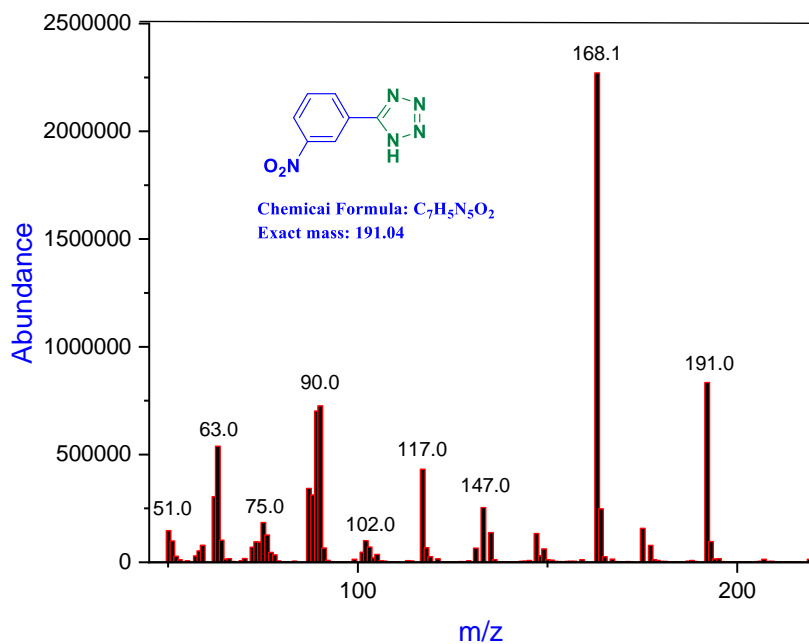

**Figure 5:** The Mass spectrum of 5-(3-nitrophenyl)-1H-tetrazole.

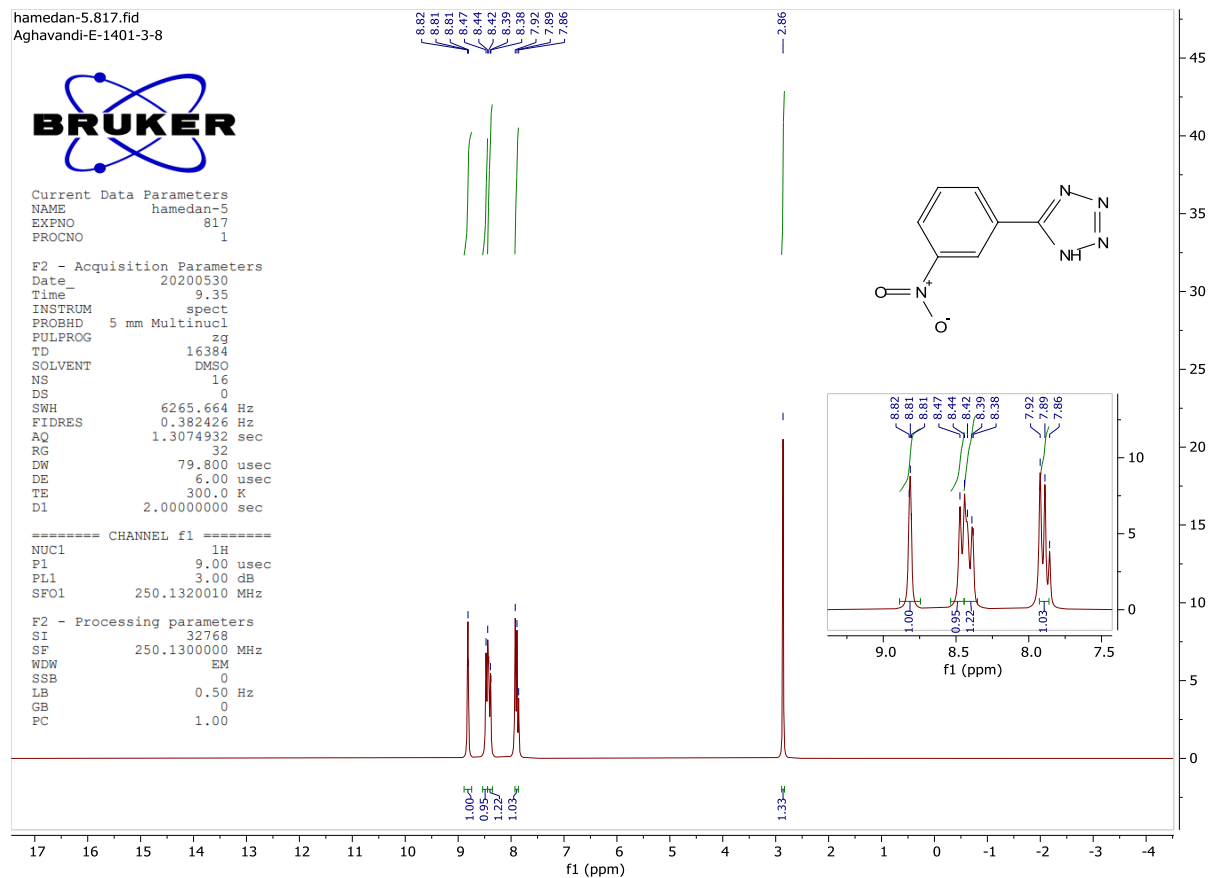

**Figure 6:**  $^1\text{H-NMR}$  5-(3-nitrophenyl)-1H-tetrazole.

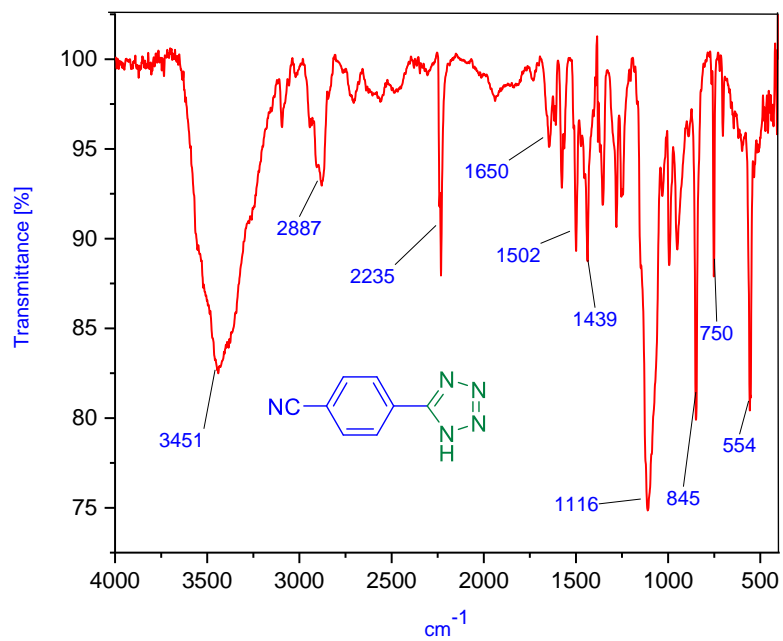

**Figure 7:** FT-IR analysis of 4-(1H-tetrazol-5-yl) benzonitrile.

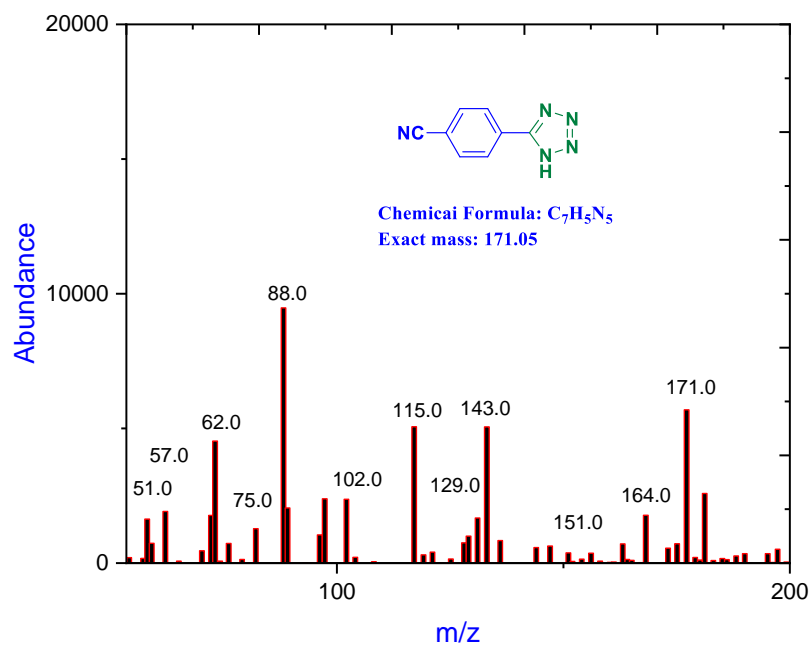

**Figure 8:** The Mass spectrum of 4-(1H-tetrazol-5-yl) benzonitrile.

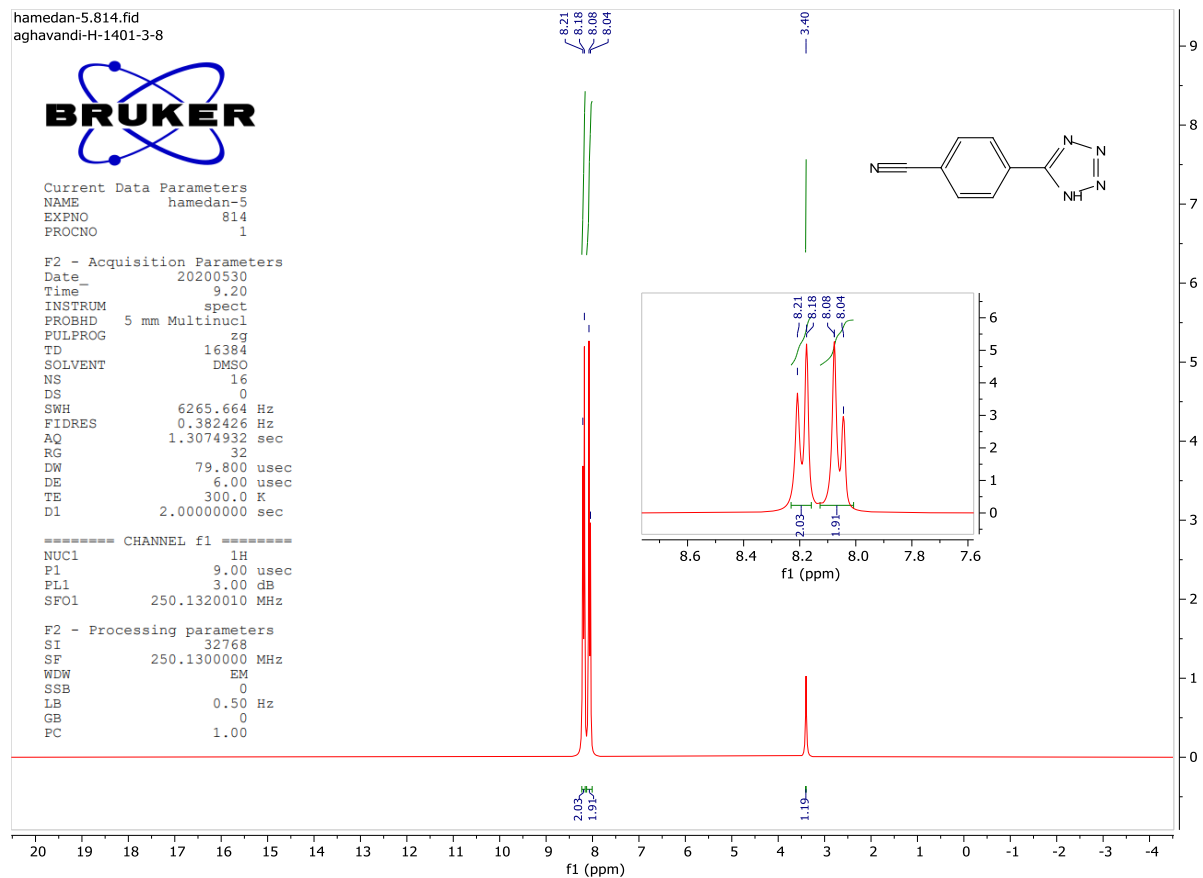

**Figure 9:**  $^1\text{H-NMR}$  4-(1H-tetrazol-5-yl) benzonitrile.



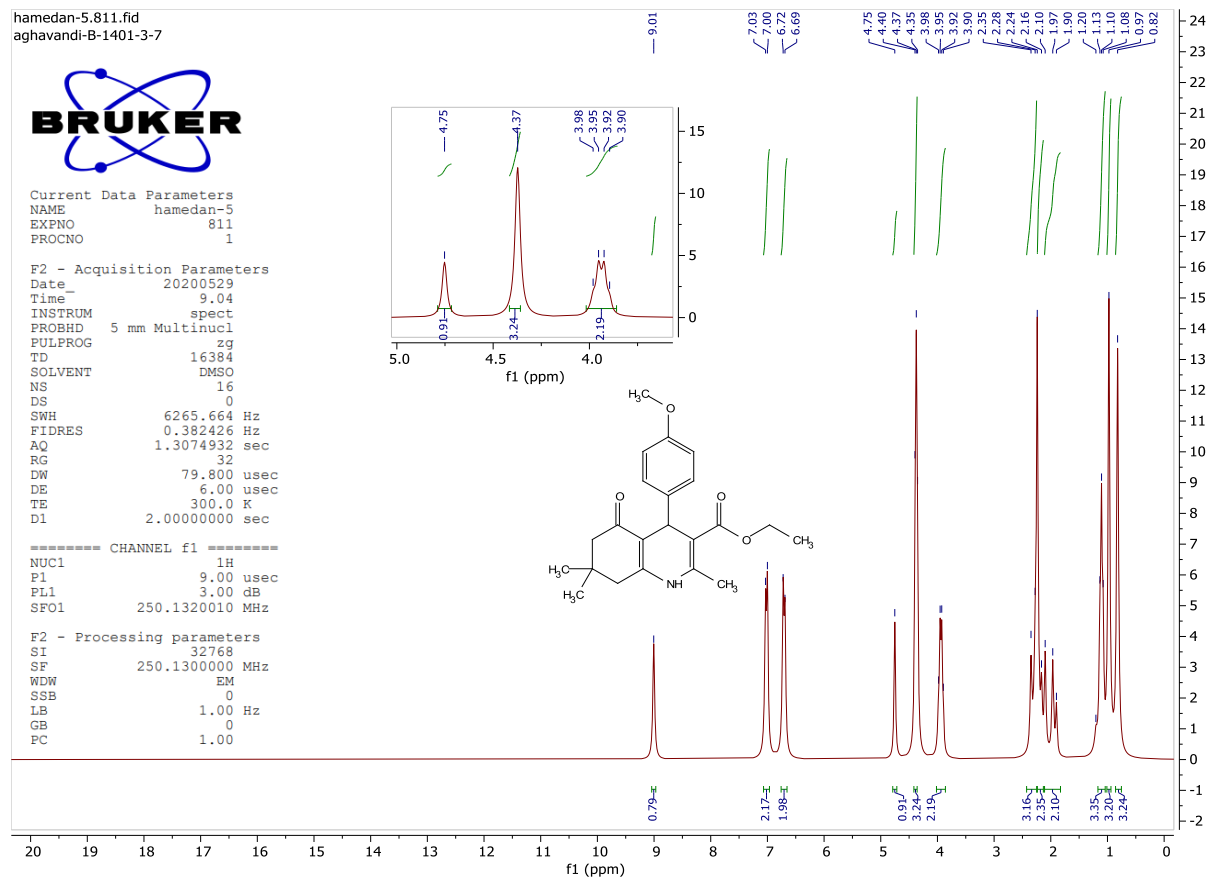

**Figure 10:**  $^1\text{H-NMR}$  ethyl 4-(4-methoxyphenyl)-2,7,7-trimethyl-5-oxo-1,4,5,6,7,8-hexahydroquinoline-3-carboxylate.

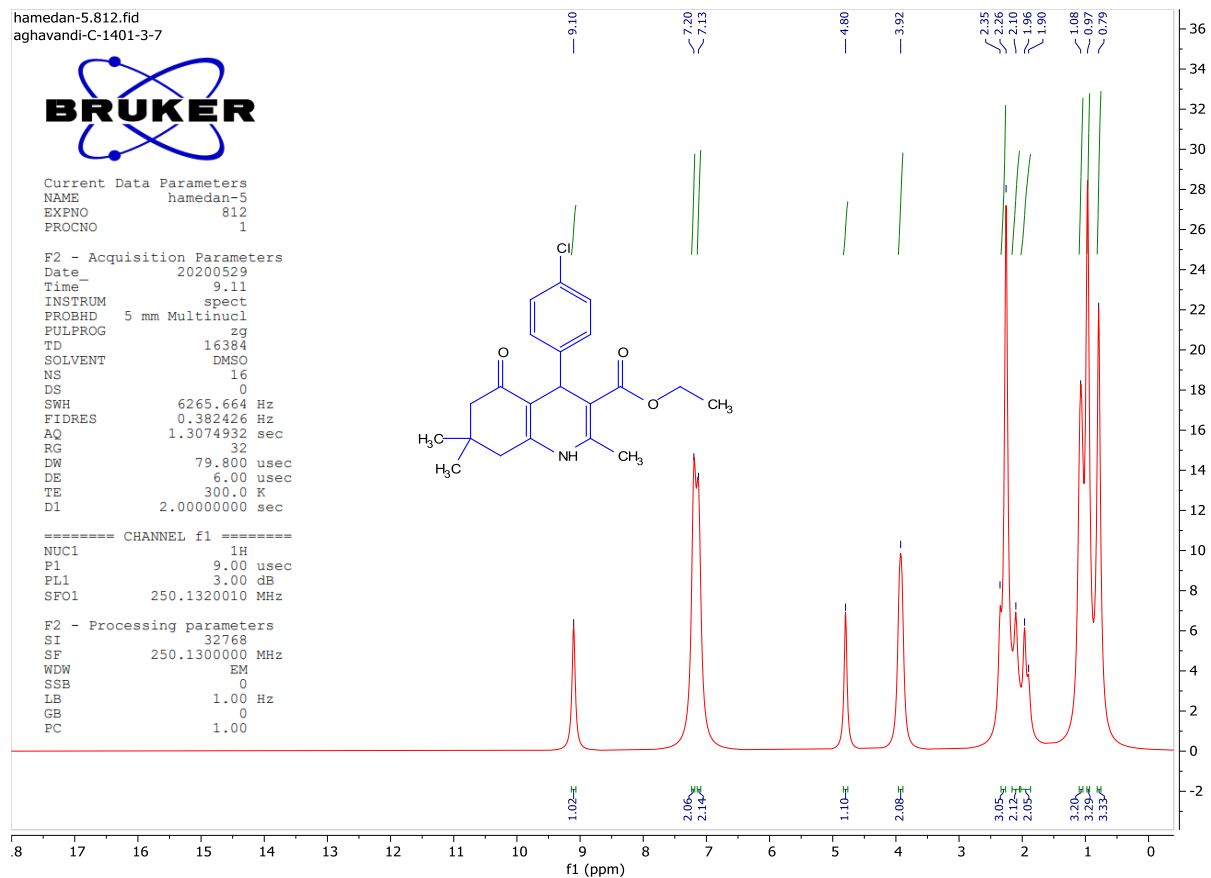

**Figure 11:**  $^1\text{H-NMR}$  ethyl 4-(4-chlorophenyl)-2,7,7-trimethyl-5-oxo-1,4,5,6,7,8-hexahydroquinoline-3-carboxylate.
